# Supplementary material for: The Anti-Proliferative and Anti-Invasive Effect of Leaf Extracts of Blueberry Plants Treated with Methyl Jasmonate on Human Gastric Cancer In Vitro Is Related to Their Antioxidant Properties
Source: Antioxidants (Basel). 2020 Jan 4;9(1):45. doi: 10.3390/antiox9010045 (PMC7023271; doi:10.3390/antiox9010045)
Supplement: Supplementary file 1 [file antioxidants-09-00045-s001.pdf]

**Table S1.** Antioxidant activity, total phenols, and total anthocyanins in leaves and fruit extracts of blueberry plants. Different lower case indicates statistically significant differences between doses and asterisk (\*) indicates statistically significant differences between extracts.

|        | Doses ( $\mu\text{g mL}^{-1}$ ) | Antioxidant Activity<br>( $\mu\text{g TE g}^{-1}\text{ FW}$ ) | Total Phenols<br>( $\mu\text{g CAE g}^{-1}\text{ FW}$ ) | Total Anthocyanins<br>( $\mu\text{g c3g g}^{-1}\text{ FW}$ ) |
|--------|---------------------------------|---------------------------------------------------------------|---------------------------------------------------------|--------------------------------------------------------------|
| Fruit  | 100                             | 232 $\pm$ 25b                                                 | 0.40 $\pm$ 0.02b                                        | 6.6 $\pm$ 0.5b                                               |
|        | 3200                            | 4377 $\pm$ 95a                                                | 16.5 $\pm$ 0.81a                                        | 126 $\pm$ 1.3a                                               |
| Leaves | 100                             | 4111 $\pm$ 42b*                                               | 5.1 $\pm$ 0.12b*                                        | 19 $\pm$ 0.3b*                                               |
|        | 3200                            | 9340 $\pm$ 19a*                                               | 28.4 $\pm$ 0.36a*                                       | 453 $\pm$ 15a*                                               |

TE: trolox equivalents; CAE: chlorogenic acid equivalents; c3g: cyanidin-3-glucoside. Different lower case indicates statistically significant differences between doses and asterisk (\*) indicates statistically significant differences between extracts.
